# Supplementary material
Source: PubMed Central journal article supplement (PMC5157836)
Supplement: NIHMS829356-supplement-Suppl_Fig_1.pdf [file NIHMS829356-supplement-Suppl_Fig_1.pdf]

# Supplementary Figure 1: Imputation server overview.

From

## Next-generation genotype imputation service and methods

Sayantan Das, Lukas Forer, Sebastian Schönherr, Carlo Sidore, Adam E Locke, Alan Kwong, Scott I Vrieze, Emily Y Chew, Shawn Levy, Matt McGue, David Schlessinger, Dwight Stambolian, Po-Ru Loh, William G Iacono, Anand Swaroop, Laura J Scott, Francesco Cucca, Florian Kronenberg, Michael Boehnke, Gonçalo R Abecasis & Christian Fuchsberger

*Nature Genetics* **48**, 1284–1287 (2016) doi:10.1038/ng.3656

Received 27 January 2016 Accepted 02 August 2016 Published online 29 August 2016

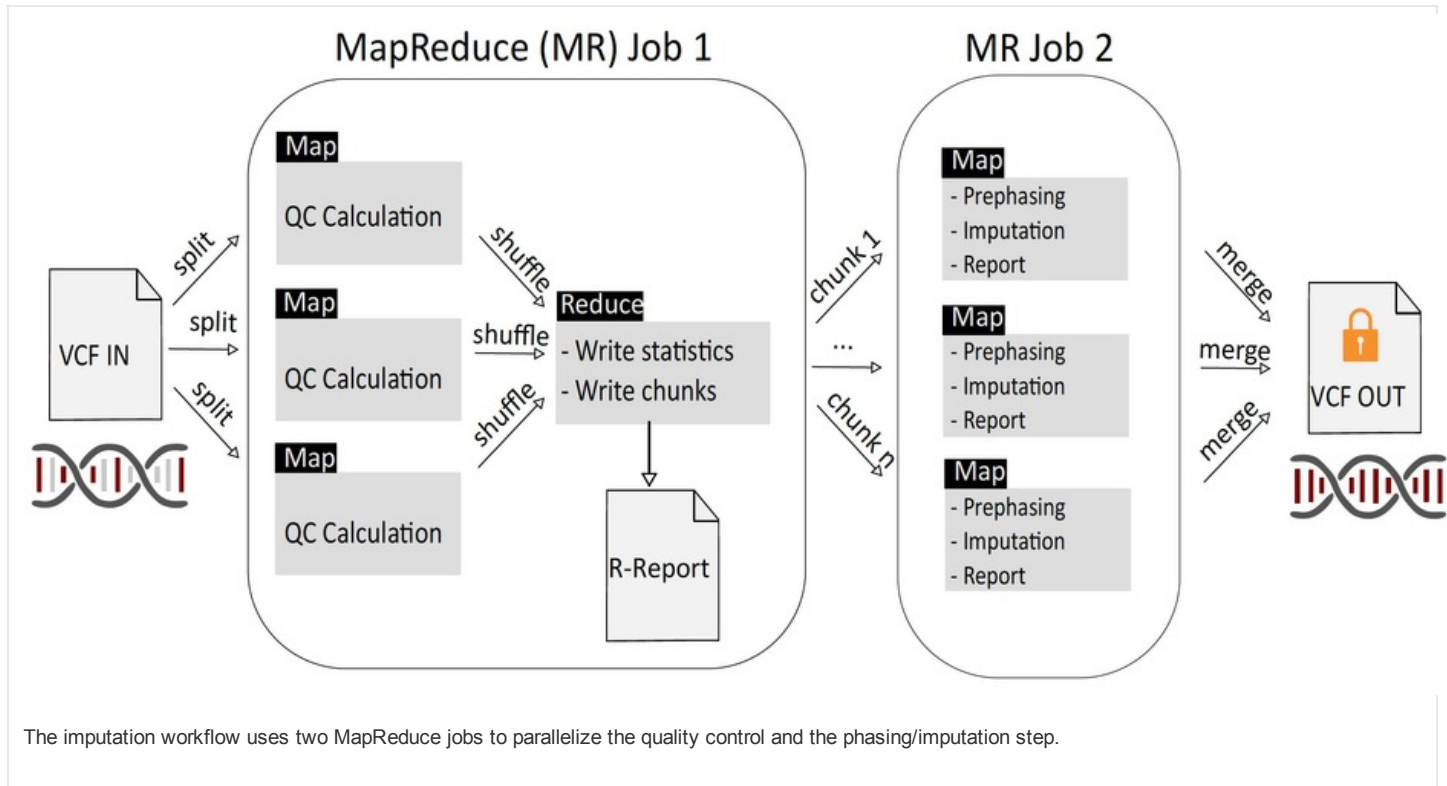

The imputation workflow uses two MapReduce jobs to parallelize the quality control and the phasing/imputation step.
