# Supplementary material
Source: PubMed Central journal article supplement (PMC5157836)
Supplement: NIHMS829356-supplement-Suppl_Fig_3.pdf [file NIHMS829356-supplement-Suppl_Fig_3.pdf]

## Supplementary Figure 3: Parameter estimation study.

From

### Next-generation genotype imputation service and methods

Sayantan Das, Lukas Forer, Sebastian Schönherr, Carlo Sidore, Adam E Locke, Alan Kwong, Scott I Vrieze, Emily Y Chew, Shawn Levy, Matt McGue, David Schlessinger, Dwight Stambolian, Po-Ru Loh, William G Iacono, Anand Swaroop, Laura J Scott, Francesco Cucca, Florian Kronenberg, Michael Boehnke, Gonçalo R Abecasis & Christian Fuchsberger

*Nature Genetics* **48**, 1284–1287 (2016) doi:10.1038/ng.3656

Received 27 January 2016 Accepted 02 August 2016 Published online 29 August 2016

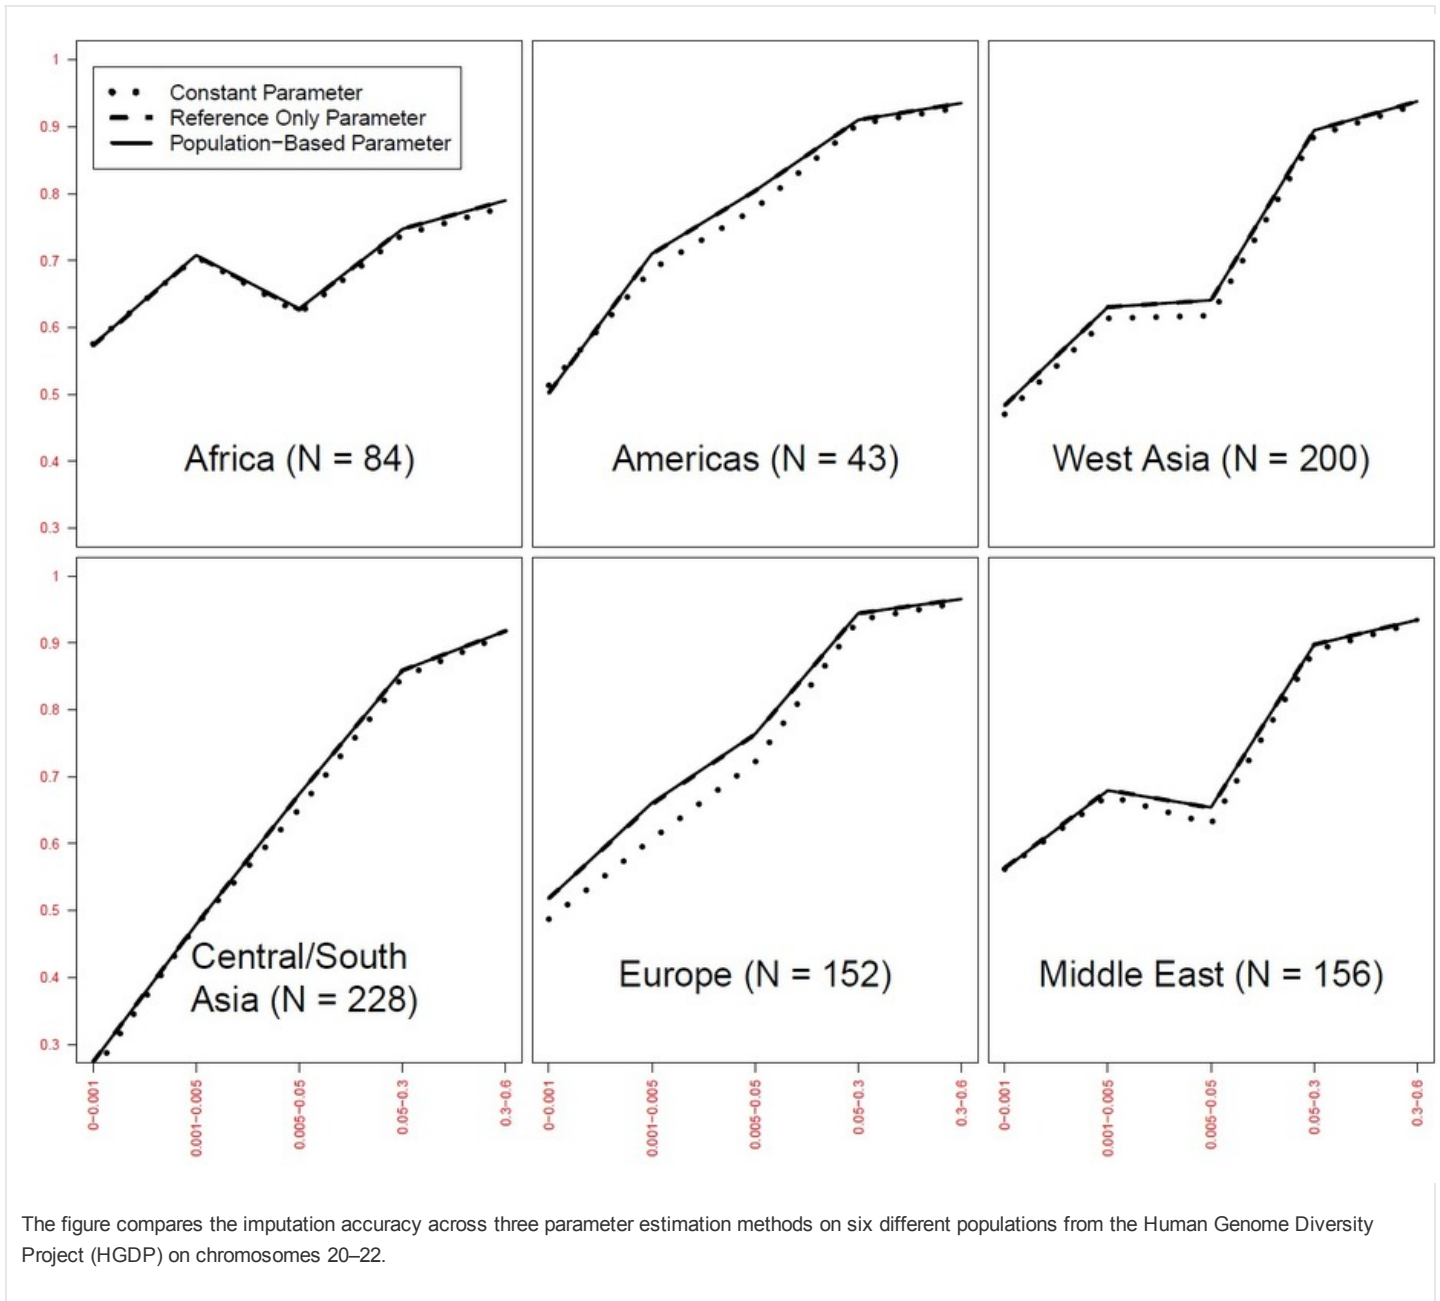

The figure compares the imputation accuracy across three parameter estimation methods on six different populations from the Human Genome Diversity Project (HGDP) on chromosomes 20–22.

**SPRINGER NATURE**

[More info](#)

© 2016 Macmillan Publishers Limited, part of Springer Nature. All rights reserved.  
partner of AGORA, HINARI, OARE, INASP, ORCID, CrossRef, COUNTER and COPE
