# Supplementary material
Source: PubMed Central journal article supplement (PMC5157836)
Supplement: NIHMS829356-supplement-Suppl_Tables_1-4.pdf [file NIHMS829356-supplement-Suppl_Tables_1-4.pdf]

**Supplementary Table 1** Imputation accuracy. Results are based on simulated haplotypes under a coalescent model consistent with European haplotype diversity, and imputed into GWAS data.

| Reference panel<br>sample size | Imputation accuracy<br>[mean r <sup>2</sup> ] |        |      | Probability an individual judged by<br>imputation to carry the rare allele<br>actually does carry that allele |        |      |
|--------------------------------|-----------------------------------------------|--------|------|---------------------------------------------------------------------------------------------------------------|--------|------|
|                                | Minor allele frequency bin                    |        |      |                                                                                                               |        |      |
|                                | 0.01-1%                                       | 0.1-1% | >1%  | 0.01-0.1%                                                                                                     | 0.1-1% | >1%  |
| 1,000                          | 0.41                                          | 0.64   | 0.96 | 0.57                                                                                                          | 0.66   | 0.95 |
| 2,000                          | 0.49                                          | 0.71   | 0.97 | 0.64                                                                                                          | 0.72   | 0.96 |
| 5,000                          | 0.59                                          | 0.79   | 0.98 | 0.71                                                                                                          | 0.79   | 0.97 |
| 10,000                         | 0.69                                          | 0.84   | 0.98 | 0.78                                                                                                          | 0.85   | 0.98 |
| 20,000                         | 0.79                                          | 0.89   | 0.99 | 0.84                                                                                                          | 0.89   | 0.98 |

**Supplementary Table 2** Run time of minimac3 and Beagle4.1 for different reference panels and number of threads to impute 100 whole genomes (run time interpolated from analysis on chromosome 20). Both tools were run on 5 Mb chunks with 1 Mb overlap (13 chunks in serial or chromosome 20 yielding a total of 227,925 variants). Minimac3 and Beagle4.1 were run with their input file formats (m3vcf and bref, respectively).

| Reference panel | # Samples | Time (in CPU-hours – wall clock) |                        |
|-----------------|-----------|----------------------------------|------------------------|
|                 |           | minimac3 (6 threads)             | Beagle 4.1 (6 threads) |
| 1000            |           |                                  |                        |
| Genomes         | 1,092     | 4 (1.0)                          | 5 (2.4)                |
| Phase 1         |           |                                  |                        |
| AMD             | 2,074     | 9 (1.7)                          | 9 (3.3)                |
| 1000            |           |                                  |                        |
| Genomes         | 2,504     | 6 (1.4)                          | 9 (3.1)                |
| Phase 3         |           |                                  |                        |
| Sardinia        | 3,489     | 7 (1.5)                          | 11 (3.5)               |
| Combined        | 9,341     | 17 (4.6)                         | 31 (8.5)               |
| Mega            | 11,845    | 21 (6.2)                         | 40 (10.7)              |
| HRC v1.1        | 32,390    | 31 (12.13)                       | 128 (25.8)             |

**Supplementary Table 3** Imputation in diverse populations.

| 1000 Genomes<br>super population | Number of<br>genomic<br>segments | Average<br>No of<br>variants | Average<br>(S.D.)<br>number of<br>unique<br>haplotypes | Average time<br>(in seconds) to<br>impute single<br>sample | Average time<br>(in seconds) to<br>impute whole<br>genome |
|----------------------------------|----------------------------------|------------------------------|--------------------------------------------------------|------------------------------------------------------------|-----------------------------------------------------------|
| African American                 | 49,584                           | 36                           | 14 (2.6)                                               | 11.65                                                      | 582.5                                                     |
| Hispanic                         | 43,522                           | 41                           | 13 (2.5)                                               | 10.83                                                      | 541.5                                                     |
| South Asian                      | 40,031                           | 44                           | 12 (2.4)                                               | 10.42                                                      | 521.0                                                     |
| East Asian                       | 35,822                           | 49                           | 10 (2.3)                                               | 9.91                                                       | 495.5                                                     |
| European                         | 35,367                           | 50                           | 10 (2.4)                                               | 9.74                                                       | 487.0                                                     |

**Supplementary Table 4** Comparison of the VCF and the M3VCF file format for different reference panels.

| Reference panel      | Number samples | Number markers | Unzipped format [GB] |       |          | Zipped format [GB] |       |          | Time taken using 5 threads [minutes] |
|----------------------|----------------|----------------|----------------------|-------|----------|--------------------|-------|----------|--------------------------------------|
|                      |                |                | VCF                  | m3vcf | % saving | VCF                | m3vcf | % saving | Compression / Parameter estimation   |
| 1000 Genomes Phase 1 | 1,092          | 617,694        | 2.6                  | 0.17  | 93.65    | 0.08               | 0.03  | 61.90    | 5 / 19                               |
| Sardinia             | 3,489          | 331,760        | 1.9                  | 0.10  | 94.58    | 0.07               | 0.02  | 70.83    | 11 / 14                              |
| 1000 Genomes Phase 3 | 2,004          | 1,047,613      | 9.9                  | 0.34  | 96.56    | 0.22               | 0.06  | 70.73    | 30 / 66                              |
| HRC v1.1             | 32,390         | 885,404        | 108                  | 1.8   | 98.33    | 1.8                | 0.28  | 84.44    | 246 / 432                            |
